# Supplementary material for: Efficient hole transport layers based on cross-linked poly(N-vinylcarbazole) for high-performance perovskite photodetectors
Source: Royal Society of Chemistry journal article supplement (doi:10.1039/d1tc01367j), 2021-01-01
Supplement: d1tc01367j1.pdf [file d1tc01367j1.pdf]

**Efficient hole transport layers based on cross-linked poly(N-vinylcarbazole) for high-performance perovskite photodetectors**

Lijuan He, Deyu Wang, Yan Zhao, Yiqi Zhang, Wei Wei\*, Liang Shen\*

State Key Laboratory of Integrated Optoelectronics, College of Electronic Science and Engineering,  
Jilin University, Changchun 130012, China

\*Corresponding authors.

*E-mail addresses:* [weiweiee@jlu.edu.cn](mailto:weiweiee@jlu.edu.cn) (W. Wei); [shenliang@jlu.edu.cn](mailto:shenliang@jlu.edu.cn) (L. S.).

**Supporting Information**

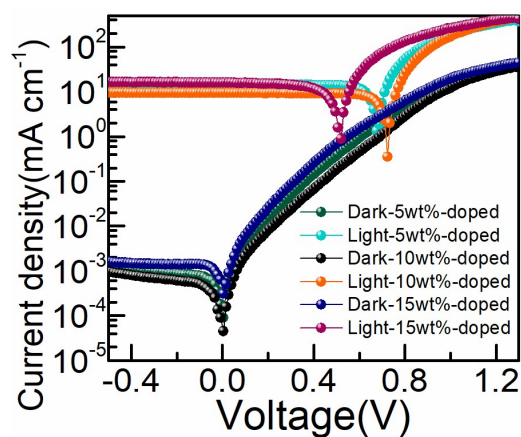

**Figure S1.** J-V characteristics curves of perovskite photodetectors on 5wt%, 10wt% and 15wt% F4TCNQ-doped PVK HTLs, respectively.

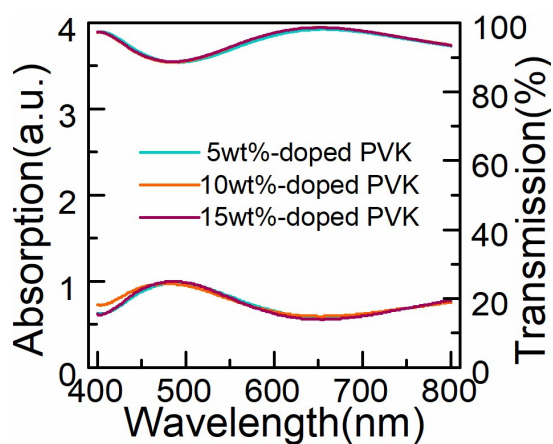

**Figure S2.** Absorption and transmission spectra of cross-linked PVK films with 5wt%, 10wt% and 15wt% F4TCNQ, respectively.

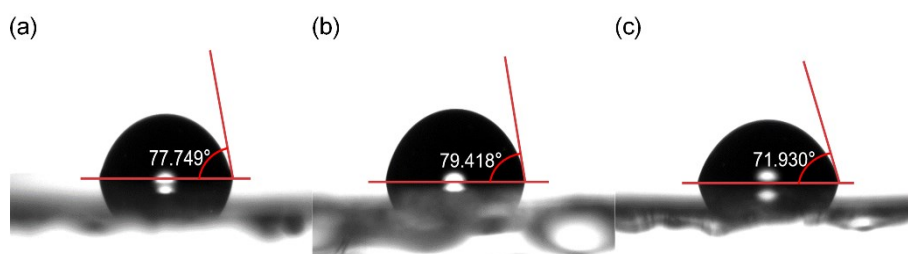

**Figure S3.** Contact angle images of water on (a) 5wt% F4TCNQ-doped PVK, (b) 10wt% F4TCNQ-doped PVK and (c) 15wt% F4TCNQ-doped PVK films.

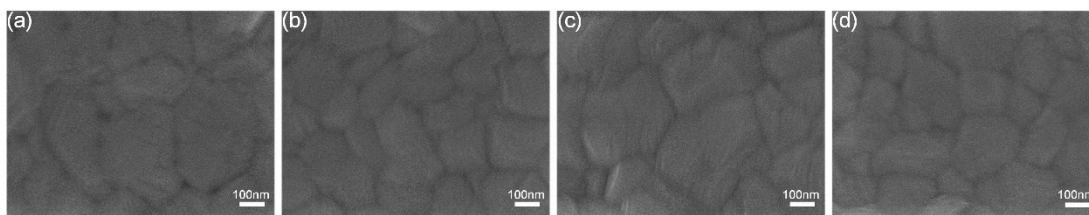

**Figure S4.** Top-view SEM images of perovskite films on (a) 0wt%, (b) 5wt%, (c) 10wt% and (d) 15wt% F4TCNQ-doped PVK layers, respectively.

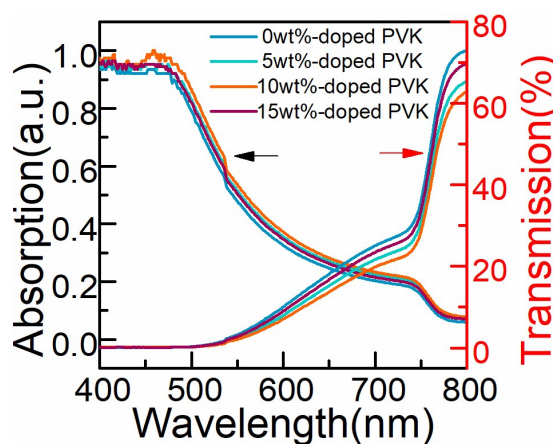

**Figure S5.** Absorption and transmission spectra of perovskite films based on 0wt%, 5wt%, 10wt% and 15wt% F4TCNQ-doped PVK layers, respectively.

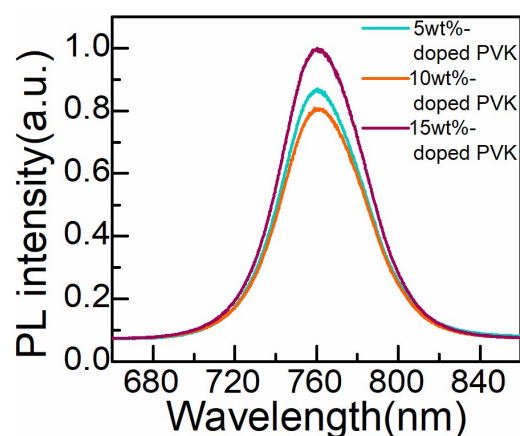

**Figure S6.** Photoluminescence (PL) spectra of perovskite films based on cross-linked PVK HTLs with different F4TCNQ doping concentration of 5wt%, 10wt% and 15wt%, respectively.

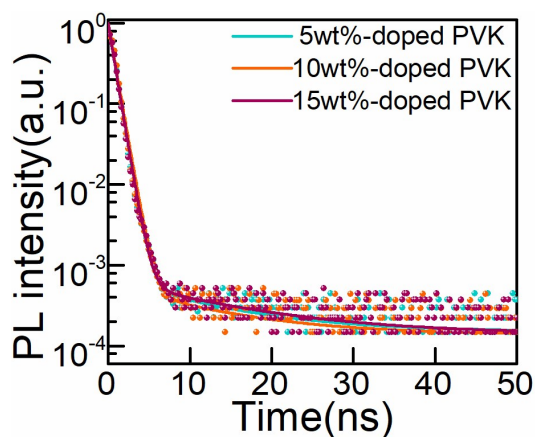

**Figure S7.** Time-resolved PL spectra of perovskite films based on 5wt%, 10wt% and 15wt% F4TCNQ-doped PVK layers, respectively.

**Table S1.** PL decay lifetimes of perovskite films based on 0wt%, 5wt%, 10wt% and 15wt% F4TCNQ-doped PVK layers.

| PVK treatment | 0wt% F4TCNQ | 5wt% F4TCNQ | 10wt% F4TCNQ | 15wt% F4TCNQ |
|---------------|-------------|-------------|--------------|--------------|
| $\tau_1$ (ns) | 21.414      | 17.464      | 14.278       | 21.973       |
| $\tau_2$ (ns) | 26.173      | 21.345      | 17.452       | 26.856       |

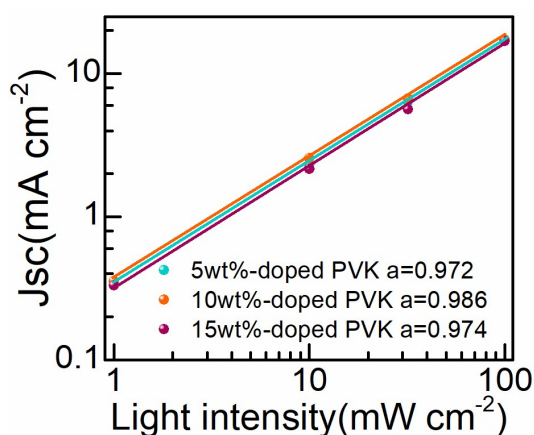

**Figure S8.**  $J_{SC}$  dependence of light intensity curves of perovskite photodetectors on 5wt%, 10wt% and 15wt% F4TCNQ-doped PVK HTLs, respectively.

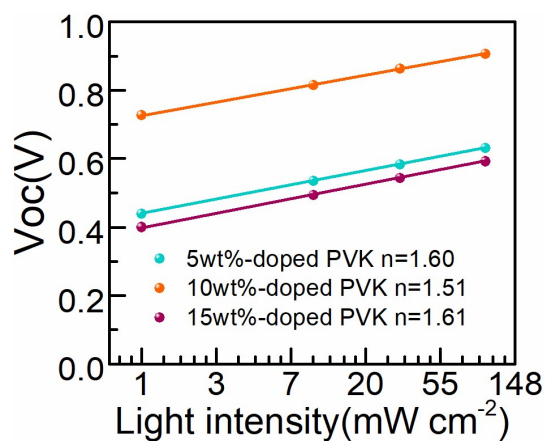

**Figure S9.**  $V_{oc}$  dependence of light intensity curves of perovskite photodetectors used 5wt%, 10wt% and 15wt% F4TCNQ-doped PVK as HTLs, respectively.

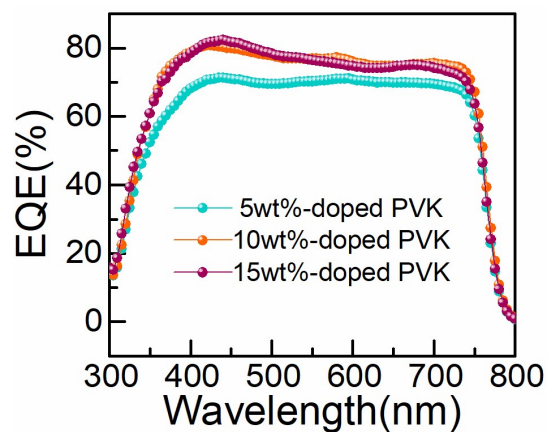

**Figure S10.** EQE spectra of perovskite photodetectors on 5wt%, 10wt% and 15wt% F4TCNQ-doped PVK HTLs, respectively.

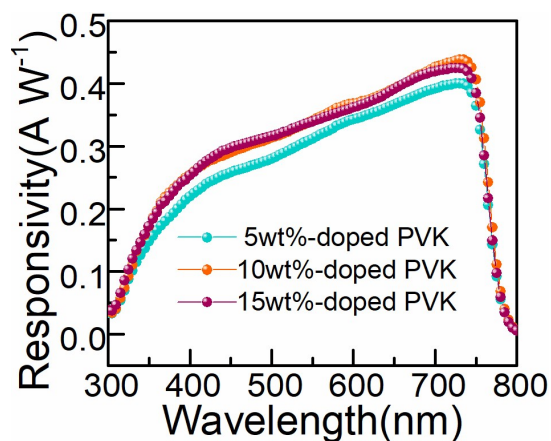

**Figure S11.** Responsivity ( $R$ ) curves of perovskite devices based on 5wt%, 10wt% and 15wt% F4TCNQ-doped PVK HTLs, respectively.

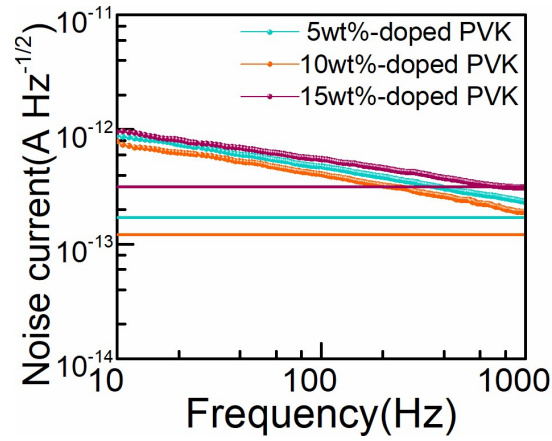

**Figure S12.** Noise current curves of devices used 5wt%, 10wt% and 15wt% F4TCNQ-doped PVK as HTLs, respectively.

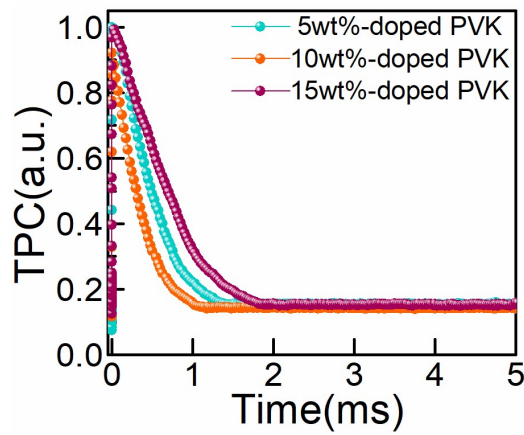

**Figure S13.** Transient photocurrent (TPC) curves of perovskite devices with 5wt%, 10wt% and 15wt% F4TCNQ-doped PVK HTLs, respectively.

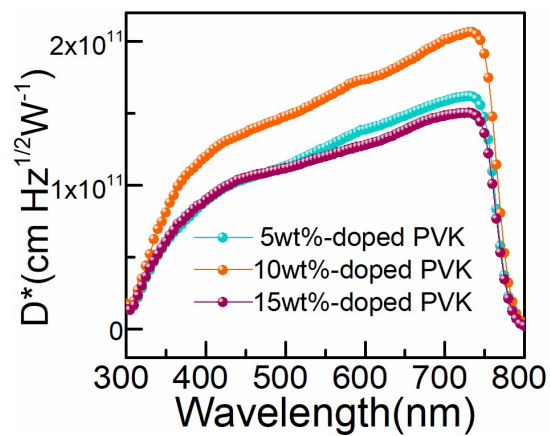

**Figure S14.** Specific detectivity ( $D^*$ ) curves of perovskite devices with 5wt%, 10wt% and 15wt% F4TCNQ-doped PVK HTLs, respectively.
